# Supplementary material for: Intronic RNAs constitute the major fraction of the non-coding RNA in mammalian cells
Source: PubMed Central journal article supplement (PMC3507791; doi:10.1186/1471-2164-13-504), 2012-09-24
Supplement: 1471-2164-13-504-S1.pdf [file 1471-2164-13-504-S1.pdf]

# Strategy for calculating intronic densities in overlapping transcripts

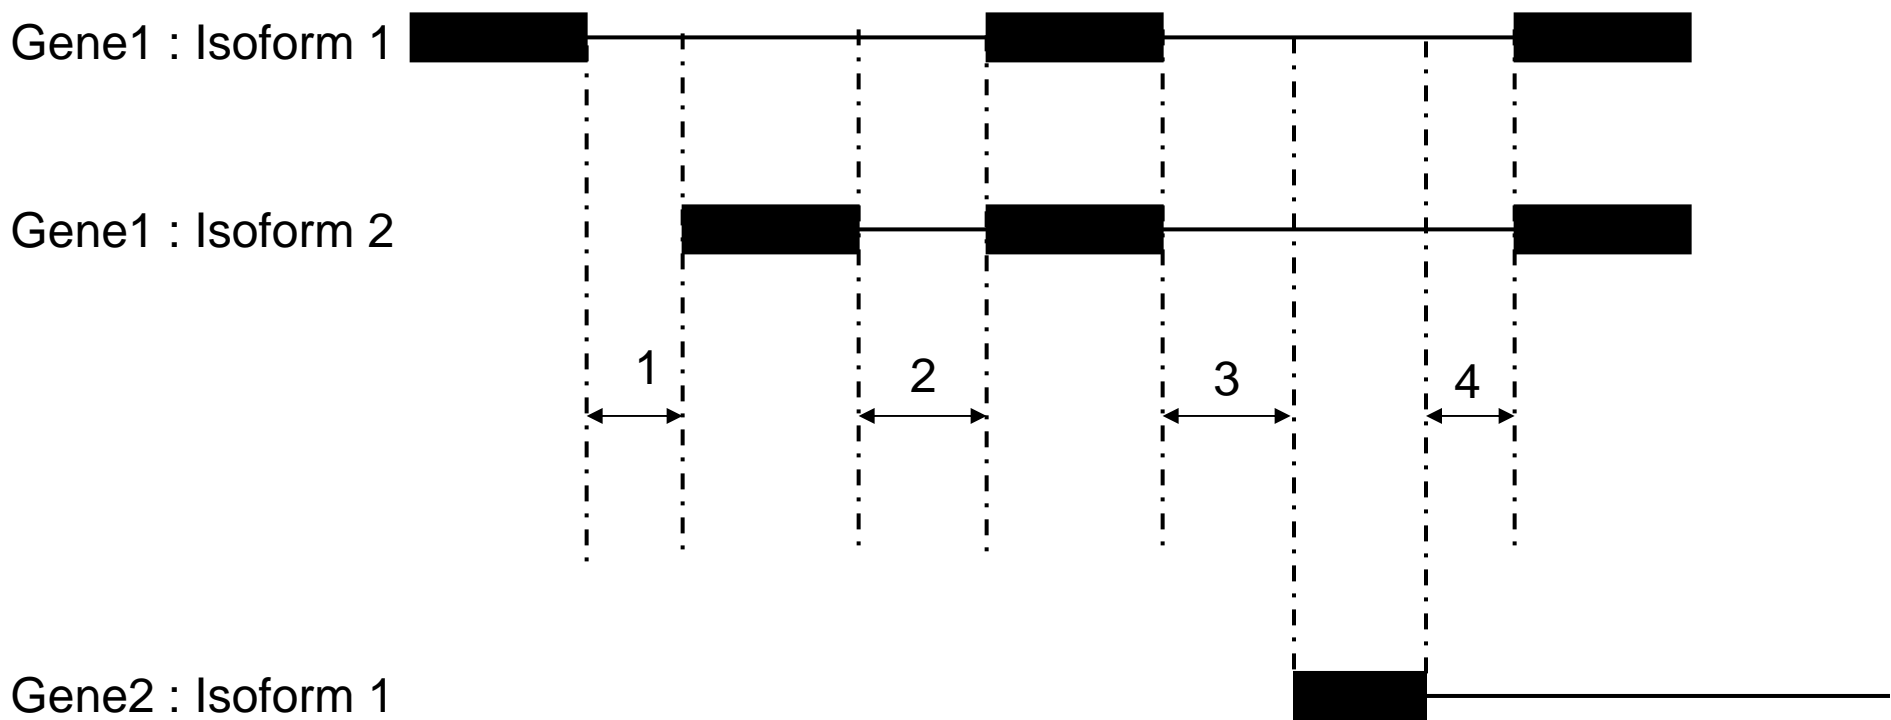

Intronic densities were calculated based on the coordinates of regions 1-4.

Figure S1
